# Supplementary material
Source: PubMed Central journal article supplement (PMC7160262)
Supplement: advancesADV2019001127-suppl1.pdf [file advancesADV2019001127-suppl1.pdf]

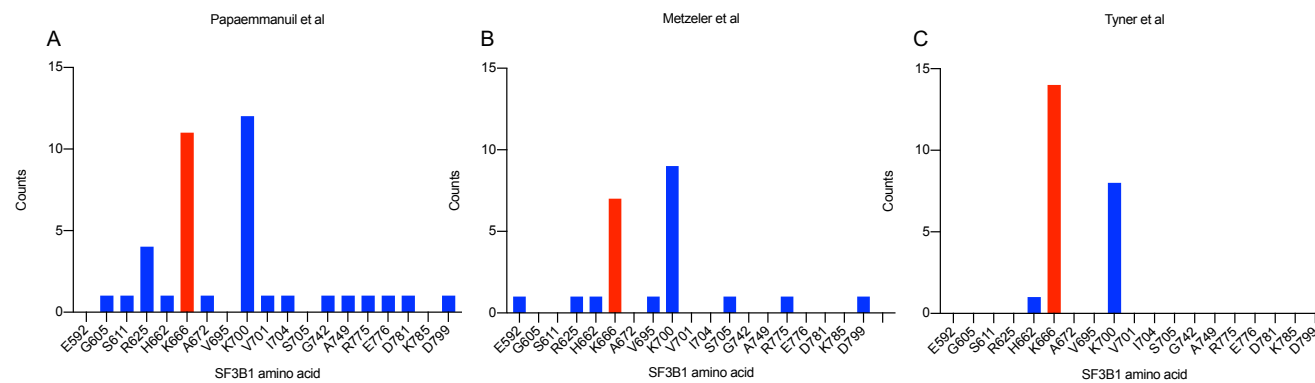

**Supplemental Figure 1. Frequent mutations of K666 in SF3B1<sup>MUT</sup> AML.** Distributions of SF3B1 mutations in patients with AML are shown for the cohorts analyzed by A) Papaemmanuil et al, B) Metzeler et al, and C) Tyner et al. Mutations at K666 are shown in red.

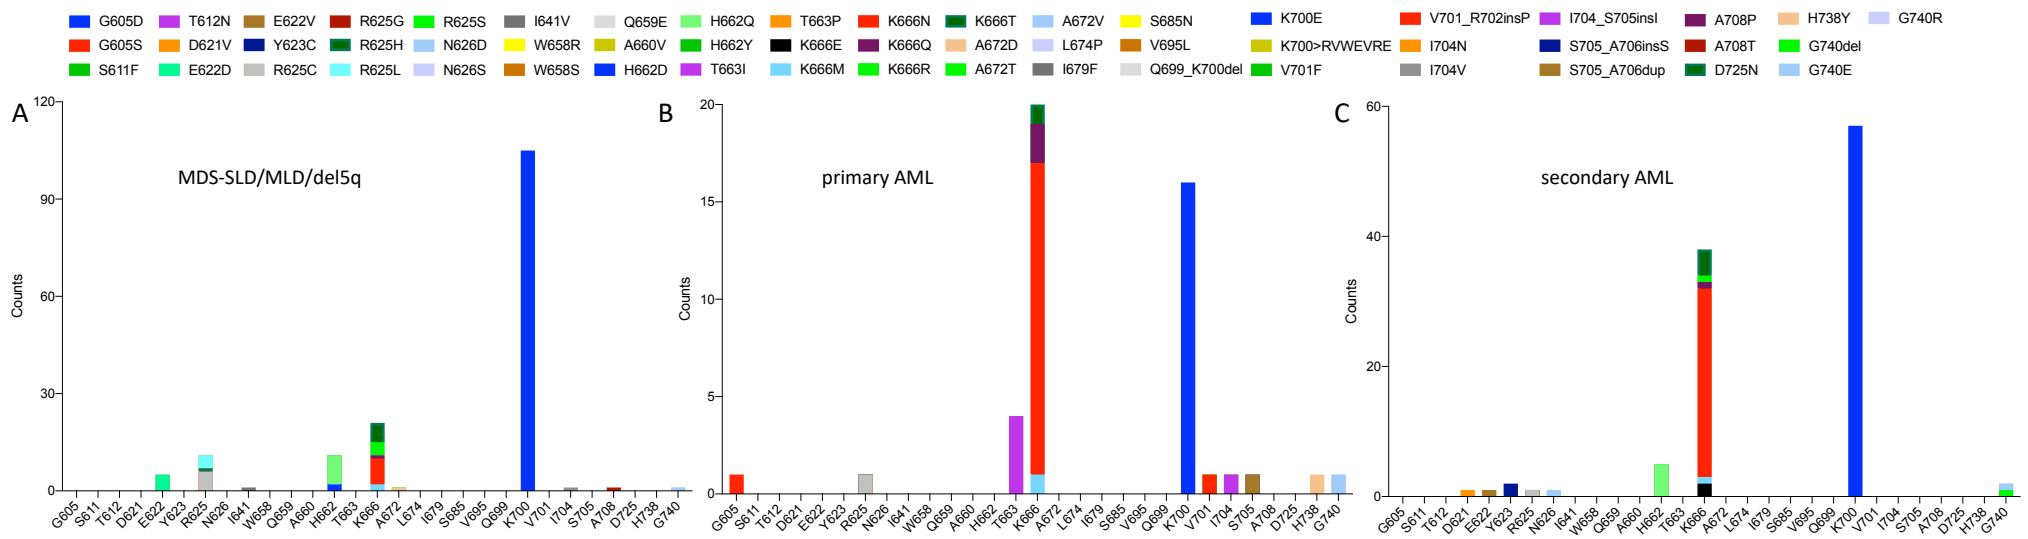

**Supplemental Figure 2. SF3B1 mutation distribution in additional patient groups.** A) MDS patients with 'non-ring-sideroblast' lower risk WHO classifications. The frequency of K666N was 5.1% (8/158), modestly but significantly higher than the 1.5% of MDS-RS (p-value = 0.011). For AML patients where the relevant clinical annotations were available, mutations were grouped according to B) primary/de novo AML or C) secondary AML.

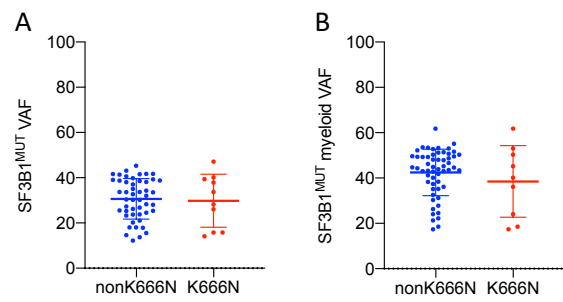

**Supplemental Figure 3. Variant allele frequencies of SF3B1<sup>K666N</sup> and other SF3B1 mutations in MDS.** Both A) raw VAFs and B) lymphoid compartment-adjusted VAFs of myeloid cells show similar distribution in the two groups.

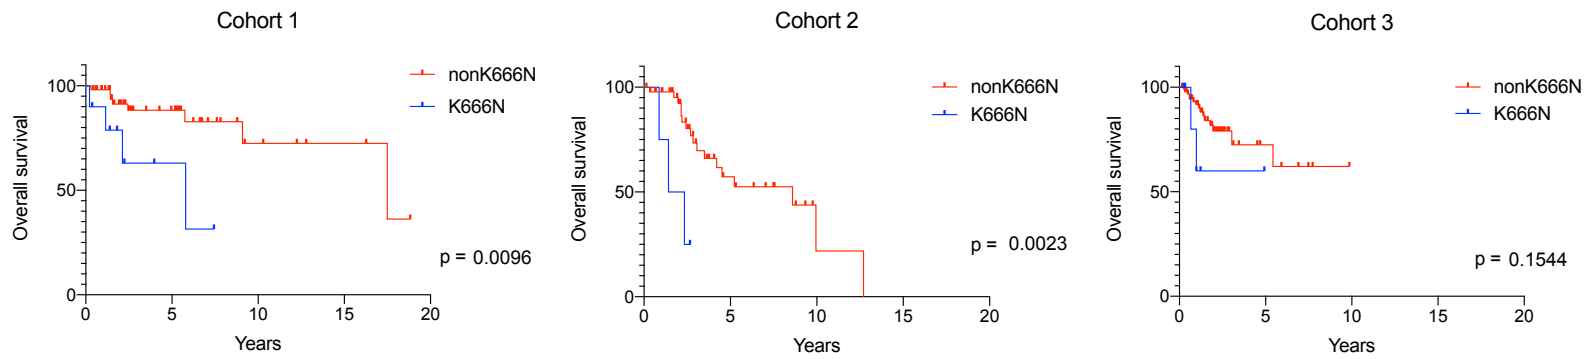

**Supplemental Figure 4. Overall survival of individual SF3B1<sup>K666N</sup> cohorts.** Overall survival was significantly decreased for K666N patients in cohorts 1 (left) and 2 (center). For cohort 3 (right), follow up was shorter for all patients, and though there was a trend towards decreased survival for K666N, this was not statistically significant. P-values were calculated with Mantel-Cox tests.

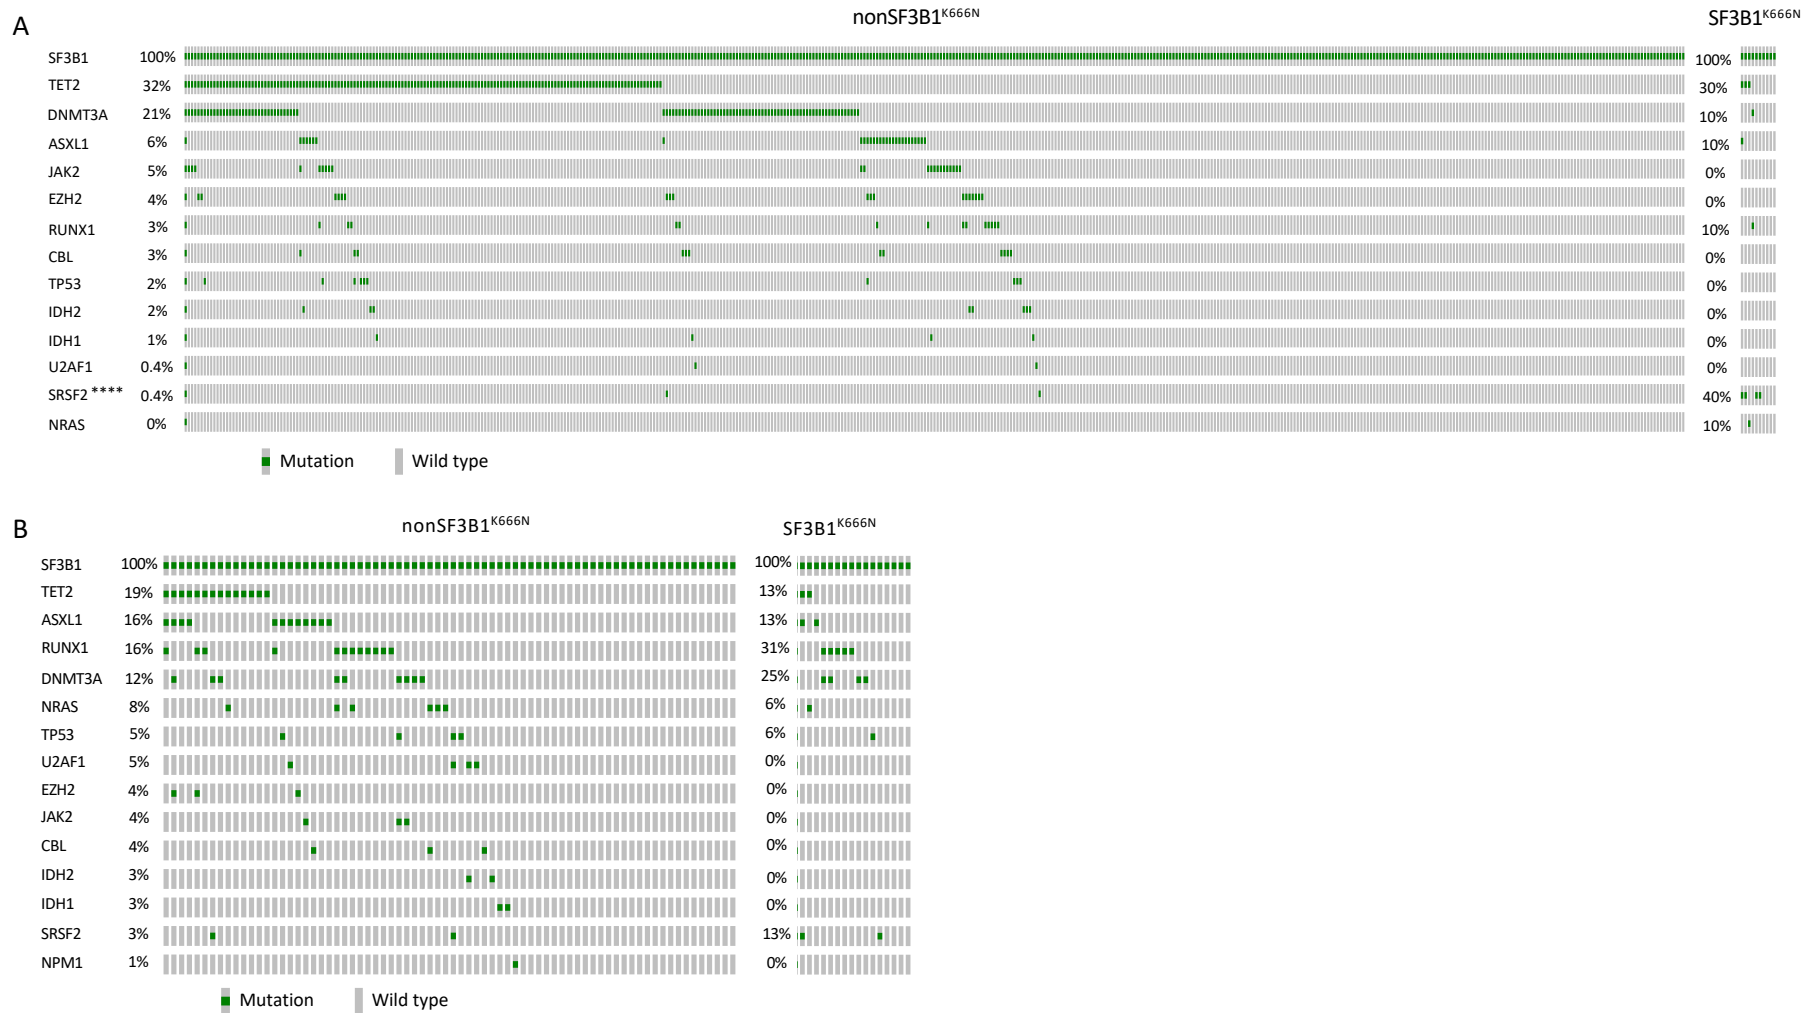

**Supplemental Figure 5. Genetic landscape of SF3B1<sup>MUT</sup> MDS-RS and MDS-EB.** A) In MDS-RS, the predominant co-mutations were in TET2 and DNMT3A. Though few SF3B1<sup>K666N</sup> cases with co-mutation data were available, there was a notable, statistically significant enrichment in SRSF2 co-mutation. \*\*\*\* = p-value < 0.0001 for Fisher's exact test. B) In MDS-EB, there were more co-mutations of ASXL1, RUNX1, and NRAS than in MDS-RS.

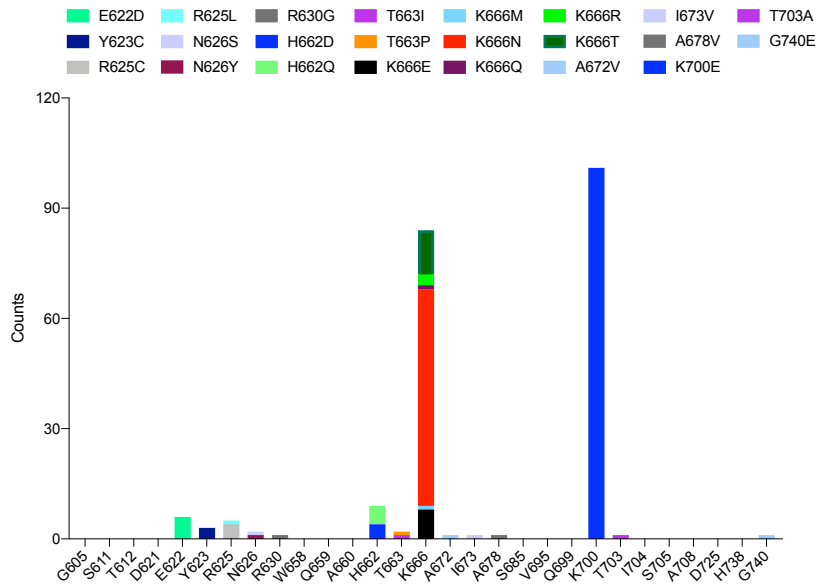

**Supplemental Figure 6. SF3B1 mutation distribution in CHIP.** Among individuals with SF3B1<sup>MUT</sup> clonal hematopoiesis of indeterminate potential (CHIP), K666N is a frequent hotspot.

**Table S1. Cohort 1 of SF3B1-mutant MDS.** World Health Organization (WHO) classification, white blood count (WBC), absolute neutrophil count (ANC), hemoglobin (Hb), platelets (PLT), bone marrow blasts, ring sideroblasts (RS), cytogenetics, and Revised International Prognostic Scoring System (IPSS-R) at time of diagnosis are shown. NA = not available.

| UPN | WHO                       | SF3B1 | VAF  | Source | Nonlymph % | Nonlymph VAF | WBC | ANC   | Hb   | PLT | Blasts | RS   | Cytogenetics                                                                                                   | IPSS-R |
|-----|---------------------------|-------|------|--------|------------|--------------|-----|-------|------|-----|--------|------|----------------------------------------------------------------------------------------------------------------|--------|
| 101 | MDS-RS-SLD                | E783K | 18.0 | PB     | 59.5       | 30.3         | 2.1 | 1.1   | 10   | 287 | <=2    | >15  | 46XX                                                                                                           | 2      |
| 102 | MDS-RS-SLD                | D781G | 23.8 | PB     | 51         | 46.6         | 4.1 | 2.5   | 9.5  | 371 | <=2    | 5    | 46XY                                                                                                           | 2      |
| 103 | MDS-RS-MLD                | D781E | NA   | PB     | 89         | NA           | 2   | 0.8   | 8.1  | 124 | 2      | <5   | 46XY                                                                                                           | 2      |
| 104 | MDS-RS-SLD                | K700E | 21.0 | PB     | 54.9       | 38.3         | 2.5 | 1.1   | 11.1 | 251 | <=2    | >15  | 46XY                                                                                                           | 1      |
| 105 | MDS-RS-MLD                | K700E | 40.6 | BM     | 91         | 44.6         | 5.8 | 4.2   | 9.5  | 218 | <=2    | >15  | 46XY                                                                                                           | 2      |
| 106 | MDS-RS-MLD                | K700E | 41.5 | PB     | 86.6       | 47.9         | 2.3 | 1.1   | 9.1  | 303 | <=2    | >15  | 46XX                                                                                                           | 2      |
| 107 | MDS with isolated del(5q) | K700E | 39.3 | BM     | 91         | 43.2         | 6.7 | 4.9   | 9.9  | 185 | <=2    | NA   | 46,XX,del(5)(q13q33)[7]/46,XX[13]                                                                              | 2      |
| 108 | MDS-MLD                   | K700E | NA   | 80     | NA         | NA           | 6.4 | 3.9   | 10.2 | 226 | <=2    | 0    | 46,XY,del(20)(q?11.2)[2]/46,XY[18]                                                                             | 1      |
| 109 | MDS-EB-2                  | K700E | 41.7 | PB     | 79         | 52.8         | 5.2 | 3.4   | 9.2  | 196 | 19     | NA   | 46,XX,add(2)(q31),der(3)t(3;8)(q21;p21),der(8)t(2;8)(q?31;p21)[20]                                             | 7      |
| 110 | MDS-RS-MLD                | K700E | 32.0 | PB     | 66.7       | 48.0         | 3.7 | 1.9   | 8.6  | 149 | <=2    | 50   | 46,XX,del(20)(q11.2)[20]                                                                                       | 2      |
| 111 | MDS-RS-SLD                | K700E | 39.8 | PB     | 74.6       | 53.4         | 4.9 | 2.7   | 9.6  | 400 | <=2    | >15  | 46XX                                                                                                           | 2      |
| 112 | MDS-RS-MLD                | K700E | 38.8 | BM     | 77         | 50.3         | 3.7 | 1.8   | 9.9  | 332 | <=2    | >15% | 46,XX,inv(3)(q21q26.2)[20]                                                                                     | 4      |
| 113 | MDS-RS-MLD                | K700E | 34.3 | PB     | 71.3       | 48.1         | NA  | NA    | NA   | NA  | NA     | 40   | 46XX                                                                                                           | NA     |
| 114 | MDS-RS-SLD                | K700E | 33.5 | PB     | 75         | 44.7         | 4.4 | 2.3   | 9.1  | 391 | <=2    | 30   | 46XX                                                                                                           | 2      |
| 115 | MDS-RS-SLD                | K700E | 38.0 | PB     | 71.1       | 53.5         | 6.3 | 3.8   | 9.1  | 373 | <=2    | >15  | 47,XX,+8[13]/46,XX[7]                                                                                          | 3      |
| 116 | MDS-RS-MLD                | K700E | 26.8 | PB     | 69.7       | 38.4         | 3.4 | 1.3   | 9.5  | 384 | <=2    | 40   | 46XX                                                                                                           | 2      |
| 117 | MDS-RS-MLD                | K700E | 33.7 | PB     | 80.7       | 41.8         | 4.5 | 2.5   | 9.1  | 220 | <=2    | 50   | 46XX                                                                                                           | 2      |
| 118 | MDS-RS-MLD                | K700E | 15.5 | PB     | 63.1       | 24.5         | 4.2 | 1.8   | 9.4  | 177 | <=2    | 50   | 46XX                                                                                                           | 2      |
| 119 | MDS-RS-MLD                | K700E | 43.1 | BM     | 85         | 50.7         | NA  | NA    | NA   | NA  | <=2    | 50   | del(20q)                                                                                                       | NA     |
| 120 | MDS-RS-SLD                | K700E | NA   | PB     | 73.4       | NA           | 5.2 | 3.2   | 10.8 | 239 | <=2    | >15  | 46XY                                                                                                           | 1      |
| 121 | MDS-RS-SLD                | K700E | 18.0 | PB     | 64.7       | 27.8         | 7.3 | 4.4   | 10.7 | 244 | <=2    | >15  | 46XY                                                                                                           | 1      |
| 122 | MDS-RS-SLD                | K700E | 33.6 | PB     | 64.4       | 52.2         | 7.3 | 3.5   | 11.9 | 221 | <=2    | >15  | 46XY                                                                                                           | 1      |
| 123 | MDS-RS-MLD                | K700E | 17.9 | PB     | 55.1       | 32.5         | 3.5 | 1.5   | 10.7 | 322 | <=2    | 5    | 46XX                                                                                                           | 1      |
| 124 | MDS-RS-SLD                | K700E | 23.3 | PB     | 62.4       | 37.4         | 5.1 | 2.1   | 10.4 | 315 | <=2    | 15   | 46XY                                                                                                           | 1      |
| 125 | MDS-RS-MLD                | K700E | 25.3 | BM     | 49         | 51.6         | 5.8 | 3.5   | 6.3  | 65  | <=2    | >15  | 46XX                                                                                                           | 3      |
| 126 | MDS-RS-MLD                | K700E | 38.5 | PB     | 90         | 42.8         | 3.1 | 1     | 9.2  | 370 | <=2    | >15  | 47,XX,+8[19]/46,XX[1]                                                                                          | 3      |
| 127 | MDS-RS-SLD                | K700E | 23.7 | PB     | 55.2       | 43.0         | 4.5 | 1.9   | 12.2 | 283 | <=2    | NA   | 46XY                                                                                                           | 1      |
| 128 | MDS-EB-1                  | K700E | 12.2 | BM     | 55         | 22.2         | 2.8 | 1.5   | 12.3 | 233 | 5      | 0    | 46,XX,der(3)t(3;5)(q12;q31),der(5)del(5)(q13q31)t(3;5)(q12;q31)[17]/46,XX[3]                                   | 3      |
| 129 | MDS-RS-SLD                | K700E | 41.4 | PB     | 83.6       | 49.5         | 4.6 | 2.806 | 9.8  | 306 | <=2    | 20   | 46XX                                                                                                           | 2      |
| 130 | MDS-RS-MLD                | K700E | 13.7 | BM     | 52         | 26.3         | 2.1 | 1.3   | 9.4  | 90  | <=2    | 20   | 46XY                                                                                                           | 2.5    |
| 131 | MDS-RS-MLD                | K700E | 30.4 | PB     | 59.2       | 51.4         | 3.6 | 1.8   | 9.7  | 218 | <=2    | 20   | 46XX                                                                                                           | 2      |
| 132 | MDS-RS-MLD                | K666T | 25.4 | PB     | NA         | NA           | 2.3 | 1.6   | 7.3  | 83  | <=2    | >15  | 46XY                                                                                                           | 3      |
| 133 | MDS-RS-SLD                | K666R | 37.0 | PB     | 74.9       | 49.4         | 9.9 | 5.8   | 9.8  | 355 | <=2    | >15  | 46XY                                                                                                           | 2      |
| 134 | MDS-RS-MLD                | K666R | NA   | BM     | 92         | NA           | 1.7 | 1.1   | 9    | 41  | <=2    | >15  | 46XY                                                                                                           | 3      |
| 135 | MDS-RS-MLD                | K666N | 26.0 | PB     | 64.9       | 40.1         | 4.9 | 2.2   | 10.2 | 139 | <=2    | 5    | 46XY                                                                                                           | 1      |
| 136 | MDS-RS-MLD                | K666N | 14.1 | BM     | 81         | 17.4         | 3.7 | 2.2   | 14.2 | 81  | <=2    | 5    | 46,XY,del(20)(q11.2q13.1)[10]/46,XY[10]                                                                        | 1.5    |
| 137 | MDS-RS-MLD                | K666N | 33.7 | BM     | 67         | 50.3         | 2   | 0.5   | 7.7  | 65  | 4      | 6    | 46XY                                                                                                           | 4.5    |
| 138 | MDS-RS-MLD                | K666N | 37.9 | PB     | 84         | 45.2         | 9.4 | 5.9   | 8.2  | 122 | 2      | >15  | 46XY                                                                                                           | 2.5    |
| 139 | MDS-EB-2                  | K666N | 40.1 | BM     | 65         | 61.8         | 4.7 | 2.4   | 11.4 | 34  | 15     | 10   | 46,XY,del(20)(q11.2q13.3)[20]                                                                                  | 5      |
| 140 | MDS-RS-MLD                | K666N | 47.1 | BM     | NA         | NA           | 2.1 | 1.3   | 7.3  | 26  | <=2    | >15  | 46XX                                                                                                           | 3.5    |
| 141 | MDS-MLD                   | K666N | 39.4 | PB     | 74.3       | 53.0         | 3.9 | 1.4   | 10.1 | 91  | 3      | 0    | 46XX                                                                                                           | 2.5    |
| 142 | MDS-EB-1                  | K666N | 15.8 | BM     | 66         | 24.0         | 3.9 | 0.7   | 11.8 | 103 | 5      | 0    | 46XY                                                                                                           | 3.5    |
| 143 | MDS-EB-1                  | K666N | 28.2 | PB     | 78         | 36.1         | 1.7 | 0.8   | 6.7  | 56  | 5      | NA   | 46XY, ider(20) (q10)del(20)(q11.2q13.3) [5] 47, idem,+der(2) (q10)del(20)(q11.2q13.3) [10] 46XY [5]            | 8      |
| 144 | MDS-RS-MLD                | K666N | 15.8 | PB     | 85.2       | 18.5         | 3.8 | 2.6   | 12.2 | 114 | <=2    | 5    | NA                                                                                                             | NA     |
| 145 | MDS-RS-MLD                | K666M | 41.7 | PB     | 84.2       | 49.6         | 4.5 | 2.7   | 11.3 | 52  | <=2    | >15  | 46XY                                                                                                           | 1.5    |
| 146 | MDS-EB-1                  | T663I | 39.0 | PB     | 79.2       | 49.3         | 7.8 | 4.7   | 8.2  | 477 | 5      | 11   | 46XY                                                                                                           | 4      |
| 147 | MDS-RS-SLD                | H662Q | 28.0 | PB     | 79.8       | 35.1         | 8.9 | 6.4   | 9.8  | 332 | <=2    | 45   | 46XX                                                                                                           | 2      |
| 148 | MDS-RS-MLD                | H662Q | 25.5 | PB     | 49.9       | 51.2         | 3.1 | 1.1   | 9.1  | 188 | <=2    | 15   | 46XX                                                                                                           | 2      |
| 149 | MDS-RS-MLD                | H662Q | 27.3 | PB     | 59.1       | 46.2         | 3.2 | 0.8   | 7.7  | 318 | <=2    | 15   | 46XX                                                                                                           | 2.5    |
| 150 | MDS-RS-MLD                | W658S | 45.3 | BM     | 92         | 49.3         | 1.9 | 0.3   | 10.5 | 175 | <=2    | >15  | 46XY                                                                                                           | 1.5    |
| 151 | MDS-RS-MLD                | N626D | 41.6 | PB     | 75.5       | 55.1         | 2.8 | 1.6   | 8.3  | 143 | 2      | 30   | 46XY                                                                                                           | 2      |
| 152 | MDS-RS-MLD                | R625L | 24.5 | PB     | 57.1       | 43.0         | 4.9 | 2.7   | 7.3  | 196 | <=2    | 5    | 46XY                                                                                                           | 2.5    |
| 153 | MDS-RS-SLD                | R625L | 30.2 | PB     | 69.7       | 43.4         | NA  | NA    | NA   | NA  | <=2    | >15  | 46,XY,+8                                                                                                       | NA     |
| 154 | MDS-RS-SLD                | R625G | 38.7 | PB     | 86.1       | 44.9         | 4.3 | 2.3   | 11.1 | 215 | <=2    | >15  | 46XY                                                                                                           | 1      |
| 155 | MDS with isolated del(5q) | R625C | 14.6 | PB     | 68.5       | 21.3         | 2.5 | 1.4   | 9.6  | 180 | <=2    | 0    | 46,XX,del(5)(q15q33)[7]/46,XX[14]                                                                              | 2      |
| 156 | MDS-SLD                   | R625C | 30.2 | PB     | 68.7       | 43.9         | 4.1 | 1.3   | 9.1  | 118 | <=2    | NA   | 46XY                                                                                                           | 2      |
| 157 | MDS-RS-MLD                | R625C | 26.2 | PB     | 60.2       | 43.5         | 6.1 | 3.3   | 10.3 | 319 | <=2    | >15  | 46XY                                                                                                           | 1      |
| 158 | MDS-RS-MLD                | R625C | 32.7 | BM     | 93         | 35.2         | 3.9 | 2     | 9    | 177 | <=2    | >15  | 46XX                                                                                                           | 2      |
| 159 | MDS-RS-MLD                | Y623C | 20.2 | PB     | 64.6       | 31.2         | 1.2 | 0.7   | 12.1 | 95  | 4      | 5    | 46,XX,del(2)(q11.2q21),del(3)(p21),-7,del(7)(q22),inv(9)(p12q13),add(20)(q13.1),add(21)(q22),+mar[2]/46,XX[18] | 6      |
| 160 | NA                        | E622D | 33.7 | PB     | 63.2       | 53.3         | 9.7 | 5.9   | 9.7  | 639 | NA     | NA   | NA                                                                                                             | NA     |
| 161 | MDS-RS-MLD                | E622D | 38.1 | PB     | 86         | 44.3         | 5.3 | 2.9   | 11.4 | 475 | <=2    | >15  | 46XY                                                                                                           | 1      |
| 162 | MDS-RS-MLD                | E622D | 28.3 | PB     | 58         | 48.7         | 5.4 | 2.29  | 8.7  | 333 | 2      | 5    | 46XY                                                                                                           | 2      |
| 163 | MDS-RS-MLD                | E622D | 35.0 | BM     | 85         | 41.2         | 6.2 | 3.5   | 8.4  | 446 | <=2    | 10   | 46XY                                                                                                           | 2      |

**Table S2. Cohort 2 of SF3B1-mutant MDS.** World Health Organization (WHO) classification, white blood count (WBC), absolute neutrophil count (ANC), hemoglobin (Hb), platelets (PLT), bone marrow blasts, ring sideroblasts (RS), cytogenetics, and Revised International Prognostic Scoring System (IPSS-R) at time of diagnosis are shown. NA = not available.

| UPN | WHO                       | SF3B1 | WBC  | ANC    | Hb   | PLT | Blasts | RS   | Cytogenetics                                                                                                                                                     | IPSS-R |
|-----|---------------------------|-------|------|--------|------|-----|--------|------|------------------------------------------------------------------------------------------------------------------------------------------------------------------|--------|
| 201 | MDS-RS-SLD                | A744Y | 9    | 5.5    | 10.9 | 436 | <=2    | 35   | 46XX                                                                                                                                                             | 1      |
| 202 | MDS-RS-MLD                | A744P | 11.2 | 8.3    | 6.5  | 157 | <=2    | >15  | 46XY                                                                                                                                                             | 2.5    |
| 203 | MDS-MLD                   | G740E | NA   | NA     | NA   | NA  | <=2    | <5   | NA                                                                                                                                                               | NA     |
| 204 | MDS-RS-MLD                | G740E | 3.2  | 0.85   | 10.9 | 211 | <=2    | 10   | 46XX                                                                                                                                                             | 1      |
| 205 | MDS-RS-MLD                | K700E | 5.5  | 3.025  | 8.9  | 144 | <=2    | >15  | 46XY                                                                                                                                                             | 2      |
| 206 | MDS-RS-MLD                | K700E | 3.4  | 1.87   | 9.1  | 218 | <=2    | 50   | 46XX                                                                                                                                                             | 2      |
| 207 | MDS-RS-SLD                | K700E | 7.4  | 4.07   | 10.7 | 149 | <=2    | >10  | 46XX                                                                                                                                                             | 1      |
| 208 | MDS-RS-MLD                | K700E | NA   | NA     | NA   | NA  | <=2    | >15  | NA                                                                                                                                                               | NA     |
| 209 | MDS-RS-SLD                | K700E | 6.6  | 3.5    | 7.2  | 425 | <=2    | 22   | 45X,-Y[18],XY[2]                                                                                                                                                 | 1.5    |
| 210 | MDS with isolated del(5q) | K700E | 6.1  | 3.355  | 10.9 | 180 | <=2    | >15  | 46,XX,del(5)(q22q35)[12]/46,XX[8]                                                                                                                                | 1      |
| 211 | MDS with isolated del(5q) | K700E | NA   | NA     | NA   | NA  | <=2    | >15  | 46,XY,del(5)(q22q35)[11]/46,XY[9]                                                                                                                                | NA     |
| 212 | MDS-RS-MLD                | K700E | 4.8  | 2.64   | 8.7  | 319 | 4      | >15  | 46XX                                                                                                                                                             | 3      |
| 213 | MDS-EB-1                  | K700E | 9.6  | 5.28   | 9    | 98  | 7      | NA   | 46XY                                                                                                                                                             | 4.5    |
| 214 | MDS-RS-MLD                | K700E | 3.8  | 2.09   | 7.9  | 102 | <=2    | 50   | 46,XY,t(11;12)(q23;q13)[20]                                                                                                                                      | 3      |
| 215 | MDS-MLD                   | K700E | 3.9  | 2.145  | 12.4 | 90  | 3      | <5   | 46,XY,inv(3)(q21q26.2)[10]/46,XY[10]                                                                                                                             | 3.5    |
| 216 | MDS with isolated del(5q) | K700E | 6.4  | 3.52   | 8.6  | 473 | <=2    | >15  | 46,XX,del(5)(q13q33)[20]                                                                                                                                         | 2      |
| 217 | MDS-RS-MLD                | K700E | 2.2  | 1.21   | 5.9  | 93  | <=2    | 35   | 46XX,del(20)(q11.2q13.1)[20]                                                                                                                                     | 3      |
| 218 | MDS-RS-SLD                | K700E | 7.5  | 4.7    | 8    | 406 | <=2    | >15  | 46,XX                                                                                                                                                            | 2      |
| 219 | MDS-EB-1                  | K700E | 1.6  | 0.48   | 7.97 | 96  | 6      | <5   | 46,XY,del(11)(q13q23)[11]/46-48,XY,idem,del(20)(q11.2q13.1),+mar[cp8]/46,XY[1]                                                                                   | 6.5    |
| 220 | MDS-RS-MLD                | K700E | 4.4  | 2.1    | 8.4  | 268 | <=2    | >15  | 46XX                                                                                                                                                             | 2      |
| 221 | MDS-RS                    | K700E | 6.4  | 3.2    | 9.7  | 459 | <=2    | 70   | 46XY                                                                                                                                                             | 1      |
| 222 | MDS-EB1                   | K700E | 3    | 1.2    | 9.7  | 86  | 5      | NA   | 46,XX,del(5)(q31q33)[11]/46,XX[9]                                                                                                                                | 3.5    |
| 223 | MDS-RS-MLD                | K700E | 7.3  | 3.4    | 9.2  | 489 | <=2    | 50   | 46XY                                                                                                                                                             | 2      |
| 224 | MDS-RS-MLD                | K700E | 3.7  | 1.5    | 9.2  | 225 | <=2    | 50   | 46XY                                                                                                                                                             | 2      |
| 225 | MDS-RS-MLD                | K666T | 11.7 | 10.2   | 6.8  | 5   | <=2    | 5    | 45,X,-Y[3]/46,XY[17]                                                                                                                                             | 2.5    |
| 226 | MDS-SLD                   | K666T | NA   | NA     | 10.1 | NA  | <=2    | NA   | 46XY                                                                                                                                                             | NA     |
| 227 | MDS-SLD                   | K666T | NA   | NA     | NA   | NA  | <=2    | NA   | 46XX                                                                                                                                                             | NA     |
| 228 | MDS-RS-MLD                | K666R | 4.73 | 2.7    | 8.5  | 489 | <=2    | 23   | 46XX                                                                                                                                                             | 2      |
| 229 | MDS-RS-SLD                | K666R | 6.7  | 4.1    | 10.9 | 288 | <=2    | 0    | 46XY                                                                                                                                                             | 1      |
| 230 | MDS-RS-MLD                | K666R | 2.83 | 1.5    | 9.5  | 227 | <=2    | >50  | 46XY                                                                                                                                                             | 1      |
| 231 | MDS-EB-1                  | K666N | 4.1  | 2      | 9.4  | 107 | 5      | >15  | 44~47,XY,add(1)(p23),-4,add(4)(q31),del(5)(q31q35),del(6)(q15q21),-7,+8,+11,add(11)(q23),der(11)add(11)(p15)add(11)(q23),-18,add(21)(q22),+1~2mar[cp15]/46,XY[5] | 7      |
| 232 | MDS-EB-2                  | K666N | 3.4  | 1.3    | 8.6  | 167 | 15     | 0    | 45,XX,t(3;3)(q21;q26.2),-7[15]/46,XX[5]                                                                                                                          | 7      |
| 233 | MDS-MLD                   | K666N | 5.6  | 2.1    | 9    | 92  | 4      | 0    | 46XY                                                                                                                                                             | 3.5    |
| 234 | MDS-EB-2                  | K666N | 10.2 | 2.7    | 11.5 | 77  | 15     | <5   | 46XY                                                                                                                                                             | 4.5    |
| 235 | MDS-RS-MLD                | K666M | 8.1  | 5      | 8.5  | 83  | <=2    | >10  | 46XY                                                                                                                                                             | 1.5    |
| 236 | MDS-RS-SLD                | H662Y | 5.5  | 3.2    | 8.8  | 303 | <=2    | >15  | 46XY                                                                                                                                                             | 2      |
| 237 | MDS-RS-SLD                | H662Y | 7.9  | 4.345  | 11.5 | 295 | <=2    | 40   | 46XY                                                                                                                                                             | 1      |
| 238 | MDS-RS-SLD                | H662Q | 8.09 | 4.4495 | 10   | 259 | <=2    | >15  | 46XY                                                                                                                                                             | 1      |
| 239 | MDS-RS                    | H662Q | NA   | NA     | 8.9  | NA  | <=2    | NA   | 46XY                                                                                                                                                             | NA     |
| 240 | MDS-RS-MLD                | H662D | 3.9  | 2.18   | 8.1  | 121 | 3      | 30   | 46XY                                                                                                                                                             | 3      |
| 241 | MDS-MLD                   | I641V | 3.1  | 1.4    | 12.4 | 107 | <=2    | 0    | del20q                                                                                                                                                           | 1      |
| 242 | MDS-RS-SLD                | R625L | 8.4  | 4.9    | 9.1  | 352 | <=2    | 5-15 | 45,X,-Y[15]/46,XY[5]                                                                                                                                             | 1      |
| 243 | MDS-RS-MLD                | R625C | 3.8  | 2.3    | 10.4 | 259 | <=2    | >15  | 46XX                                                                                                                                                             | 1      |
| 244 | MDS-MLD                   | R625C | NA   | NA     | NA   | NA  | <=2    | NA   | 46XY                                                                                                                                                             | NA     |
| 245 | MDS-RS-SLD                | R625C | 5.2  | 2.6    | 10.9 | 226 | <=2    | >15  | 46XY                                                                                                                                                             | 1      |
| 246 | MDS with isolated del(5q) | R625C | 6.2  | 4.5    | 8.2  | 61  | <=2    | 0    | 46,XX,del(5)(q13q33)[10]/46,XX[10]                                                                                                                               | 2.5    |
| 247 | MDS-RS-SLD                | E622D | 11.1 | 5.4    | 10   | 430 | <=2    | >15  | 46XY                                                                                                                                                             | 1      |
| 248 | MDS-RS-MLD                | E622D | NA   | NA     | NA   | NA  | <=2    | 50   | 46XY                                                                                                                                                             | NA     |
| 249 | MDS-EB-1                  | E592K | 5.7  | 4.1    | 9.1  | 40  | 7      | 0    | 46XX                                                                                                                                                             | 5      |
| 250 | MDS-MLD                   | E592K | 2.3  | 1.4    | 9.2  | 79  | 3      | 0    | 46XX                                                                                                                                                             | 3.5    |



**Table S3. Cohort 3 of SF3B1-mutant MDS.** World Health Organization (WHO) classification, white blood count (WBC), hemoglobin (Hb), platelets (PLT), and Revised International Prognostic Scoring System (IPSS-R) risk category at time of diagnosis are shown.

| UPN | WHO        | SF3B1       | WBC  | Hb   | PLT | IPSS-R       |
|-----|------------|-------------|------|------|-----|--------------|
| 301 | MDS-MLD    | D907Y       | 2.4  | 7.7  | 23  | Intermediate |
| 302 | MDS-MLD    | I787S       | 4.3  | 10.5 | 83  | Intermediate |
| 303 | MDS-MLD    | G742D       | 1.6  | 7.4  | 29  | Very high    |
| 304 | MDS-MLD-RS | G742D       | 3.6  | 7.2  | 358 | High         |
| 305 | MDS-SLD-RS | G740E       | 5.9  | 8.3  | 95  | Intermediate |
| 306 | MDS-RS-SLD | G740E       | 4.7  | 5.8  | 381 | Intermediate |
| 307 | MDS-EB-2   | I704N       | 8.2  | 7.5  | 70  | High         |
| 308 | MDS-MLD-RS | K700E       | 5.2  | 6.9  | 14  | High         |
| 309 | MDS-MLD    | K700E       | 9.4  | 6.5  | 21  | Very high    |
| 310 | MDS-EB-2   | K700E       | 3.5  | 4.6  | 21  | Very high    |
| 311 | MDS-EB-1   | K700E       | 2.8  | 7.4  | 23  | High         |
| 312 | MDS-SLD-RS | K700E       | 2.4  | 8.7  | 26  | Low          |
| 313 | MDS-MLD    | K700E       | 4.4  | 5.8  | 30  | Intermediate |
| 314 | MDS-MLD    | K700E       | 2.8  | 8    | 39  | Low          |
| 315 | MDS-MLD    | K700E       | 7.7  | 7.7  | 48  | Very high    |
| 316 | MDS-EB1    | K700E       | 6.8  | 5.8  | 49  | Intermediate |
| 317 | MDS-EB-2   | K700E       | 6.0  | 9.5  | 50  | High         |
| 318 | MDS-EB-1   | K700E       | 7.1  | 5    | 50  | High         |
| 319 | MDS-MLD    | K700E       | 1.8  | 7.6  | 52  | High         |
| 320 | MDS-MLD    | K700E       | 4.2  | 6.2  | 52  | Intermediate |
| 321 | MDS-MLD    | K700E       | 1.5  | 6.9  | 55  | High         |
| 322 | MDS-MLD    | K700E       | 2.2  | 7.3  | 63  | Low          |
| 323 | MDS-MLD    | K700E       | 5.4  | 11.1 | 65  | Very low     |
| 324 | MDS-MLD    | K700E       | 2.2  | 4.6  | 67  | Low          |
| 325 | MDS-MLD-RS | K700E       | 9.0  | 6.4  | 69  | Intermediate |
| 326 | MDS-MLD    | K700E       | 3.4  | 4.7  | 70  | Low          |
| 327 | MDS-MLD-RS | K700E       | 1.6  | 7.1  | 70  | High         |
| 328 | MDS-EB-2   | K700E       | 2.7  | 5.2  | 75  | Very high    |
| 329 | MDS-MLD-RS | K700E       | 1.4  | 8    | 80  | Low          |
| 330 | MDS-MLD-RS | K700E       | 2.4  | 6.1  | 94  | Low          |
| 331 | MDS-EB2    | K700E       | 2.9  | 6.6  | 99  | Very high    |
| 332 | MDS-EB1    | K700E       | 2.22 | 8.8  | 104 | Intermediate |
| 333 | MDS-MLD    | K700E/K666N | 2.7  | 6.5  | 108 | Low          |
| 334 | MDS-MLD    | K700E       | 3.4  | 8.6  | 110 | Low          |
| 335 | MDS-MLD    | K700E       | 5.6  | 9.2  | 114 | Low          |
| 336 | MDS-SLD-RS | K700E       | 3.2  | 9.4  | 115 | Intermediate |
| 337 | MDS-MLD    | K700E       | 2.1  | 10.4 | 118 | Low          |
| 338 | MDS-MLD-RS | K700E       | 1.6  | 6.6  | 122 | Low          |
| 339 | MDS-EB-2   | K700E       | 2.9  | 5.1  | 130 | High         |
| 340 | MDS-RS-MLD | K700E       | 3.0  | 8.6  | 130 | Low          |
| 341 | MDS-MLD-RS | K700E       | 3.1  | 7.3  | 135 | Low          |
| 342 | MDS-SLD-RS | K700E       | 2.1  | 7.3  | 136 | Intermediate |
| 343 | MDS-SLD-RS | K700E       | 3.2  | 6.6  | 139 | Low          |
| 344 | MDS-RS-MLD | K700E       | 7.0  | 8.5  | 140 | Low          |
| 345 | MDS-RS-SLD | K700E       | 3.3  | 9    | 146 | Low          |
| 346 | MDS-RS-SLD | K700E       | 4.0  | 5.7  | 149 | Intermediate |
| 347 | MDS-RS-SLD | K700E       | 12.7 | 9.1  | 150 | Low          |
| 348 | MDS-MLD-RS | K700E       | 1.5  | 6    | 155 | High         |

|     |            |       |      |      |     |              |
|-----|------------|-------|------|------|-----|--------------|
| 349 | MDS-MLD    | K700E | 5.8  | 6.1  | 157 | Intermediate |
| 350 | MDS-SLD-RS | K700E | 4.08 | 6    | 159 | Low          |
| 351 | MDS-SLD-RS | K700E | 3.0  | 7    | 169 | Low          |
| 352 | MDS-MLD    | K700E | 6.7  | 7.6  | 170 | Low          |
| 353 | MDS-SLD-RS | K700E | 2.9  | 7.4  | 173 | Intermediate |
| 354 | MDS-MLD    | K700E | 2.2  | 5.3  | 188 | Low          |
| 355 | MDS-MLD    | K700E | 2.9  | 9.2  | 189 | Low          |
| 356 | MDS-RS-MLD | K700E | 3.5  | 4.8  | 196 | Intermediate |
| 357 | MDS-MLD-RS | K700E | 3.2  | 8.7  | 218 | Low          |
| 358 | MDS-EB-1   | K700E | 1.9  | 9.4  | 219 | Intermediate |
| 359 | MDS-SLD-RS | K700E | 3.4  | 9.6  | 233 | Low          |
| 360 | MDS-RS-SLD | K700E | 4.6  | 8.2  | 235 | Low          |
| 361 | MDS-RS-SLD | K700E | 5.4  | 8.5  | 242 | Intermediate |
| 362 | MDS-RS-SLD | K700E | 5.7  | 9    | 244 | Very low     |
| 363 | MDS-SLD-RS | K700E | 4.3  | 11.1 | 251 | Very low     |
| 364 | MDS-MLD    | K700E | 2.4  | 7.8  | 262 | Low          |
| 365 | MDS-MLD    | K700E | 4.7  | 7.1  | 278 | Low          |
| 366 | MDS-EB2    | K700E | 2.4  | 9.4  | 301 | Very high    |
| 367 | MDS-RS-SLD | K700E | 3.6  | 7.4  | 307 | Low          |
| 368 | MDS-RS-MLD | K700E | 3.1  | 7.4  | 332 | Intermediate |
| 369 | MDS-MLD-RS | K700E | 4.3  | 6.9  | 349 | Low          |
| 370 | MDS-MLD    | K700E | 3.4  | 6.3  | 352 | Intermediate |
| 371 | MDS-MLD    | K700E | 3.9  | 5.3  | 357 | Low          |
| 372 | MDS-RS-SLD | K700E | 3.2  | 7.3  | 365 | Intermediate |
| 373 | MDS-MLD    | K700E | 2.7  | 4    | 378 | Low          |
| 374 | MDS-RS-SLD | K700E | 5.8  | 8.1  | 421 | Low          |
| 375 | MDS-MLD-RS | K666T | 8.5  | 10.6 | 48  | Low          |
| 376 | MDS-EB1    | K666T | 6.4  | 7    | 52  | High         |
| 377 | MDS-MLD    | K666T | 0.9  | 4.8  | 73  | Intermediate |
| 378 | MDS-RS-SLD | K666R | 18.2 | 7.2  | 164 | Intermediate |
| 379 | MDS-EB1    | K666Q | 5.4  | 8.3  | 276 | Intermediate |
| 380 | MDS-EB-2   | K666N | 1.9  | 6.5  | 10  | Very high    |
| 381 | MDS-EB-1   | K666N | 1.8  | 9.4  | 36  | High         |
| 382 | MDS-EB1    | K666N | 6.4  | 9.2  | 78  | High         |
| 383 | MDS-EB1    | K666N | 1.8  | 10.5 | 87  | Intermediate |
| 384 | MDS-EB2    | K666N | 7.7  | 10   | 90  | Intermediate |
| 385 | MDS-MLD    | K666N | 1.3  | 6.3  | 140 | Low          |
| 386 | MDS-MLD    | K666M | 3.6  | 7.9  | 94  | Intermediate |
| 387 | MDS-MLD-RS | K666M | 3.78 | 5.3  | 367 | Intermediate |
| 388 | MDS-EB2    | K666E | 1.7  | 7.4  | 41  | Very high    |
| 389 | MDS-EB-2   | K666E | 1.8  | 12.6 | 171 | Intermediate |
| 390 | MDS-MLD    | H662Q | 2.2  | 5.9  | 105 | Very high    |
| 391 | MDS-EB-1   | H662Q | 2.1  | 6.7  | 350 | High         |
| 392 | MDS-MLD    | H662D | 1.8  | 7.7  | 156 | Low          |
| 393 | MDS-SLD-RS | H662D | 2.1  | 8    | 190 | Low          |
| 394 | MDS-MLD    | R625L | 3.4  | 8.4  | 211 | Low          |
| 395 | MDS-MLD    | R625H | 3.6  | 9.6  | 77  | Low          |
| 396 | MDS-MLD-RS | R625G | 3.38 | 6.9  | 244 | Low          |
| 397 | MDS-MLD-RS | R625C | 3.9  | 4.1  | 166 | Low          |
| 398 | MDS-MLD-RS | R625C | 3.4  | 7.1  | 295 | Low          |
| 399 | MDS-MLD    | R625C | 2.6  | 8.1  | 306 | Low          |
| 400 | MDS-RS-SLD | R625C | 6.4  | 7.3  | 340 | Intermediate |
| 401 | MDS-MLD    | E592K | 2.3  | 7.8  | 22  | Intermediate |

**Table S4. Clonal architecture of MDS cases with SF3B1 K666N and SRSF2 mutations.** Variant allele frequencies (VAFs) and non-lymphoid-adjusted VAFs show that both SF3B1 and SRSF2 mutations are of high abundance and likely present in the same cells.

| UPN | WHO        | Gene   | Variant    | VAF   | Nonlymph VAF |
|-----|------------|--------|------------|-------|--------------|
| 135 | MDS-RS-MLD | ASXL1  | P1377Sfs*3 | 33    | 51           |
|     |            | SETBP1 | G870S      | 10    | 15           |
|     |            | SF3B1  | K666N      | 26    | 40           |
|     |            | SRSF2  | P95L       | 24    | 37           |
|     |            | TET2   | S585*      | 6     | 9            |
|     |            | TET2   | N582Kfs*53 | 12    | 18           |
| 137 | MDS-RS-MLD | BCOR   | K839fs     | 21.98 | 33           |
|     |            | SF3B1  | K666N      | 33.7  | 50           |
|     |            | SRSF2  | P95H       | 24.52 | 37           |
|     |            | STAG2  | L864*      | 35.4  | 53           |

## Supplemental references

1. Woll PS, Kjällquist U, Chowdhury O, et al. Myelodysplastic syndromes are propagated by rare and distinct human cancer stem cells in vivo. *Cancer cell*. 2014;25(6):794–808.
2. Montalban-Bravo G, Takahashi K, Patel K, et al. Impact of the number of mutations in survival and response outcomes to hypomethylating agents in patients with myelodysplastic syndromes or myelodysplastic/myeloproliferative neoplasms. *Oncotarget*. 2018;9(11):9714–9727.
3. Gentien D, Kosmider O, Nguyen-Khac F, et al. A common alternative splicing signature is associated with SF3B1 mutations in malignancies from different cell lineages. *Leukemia*. 2014;28(6):1355.
4. Kim T, Tyndel M, Kim H, et al. The clonal origins of leukemic progression of myelodysplasia. *Leukemia*. 2017;31(9):1928–1935.
5. Ali A, Penneroux J, Bello R, et al. Granulomonocytic progenitors are key target cells of azacytidine in higher risk myelodysplastic syndromes and acute myeloid leukemia. *Leukemia*. 2018;32(8):1856–1860.
6. Martin R, Acha P, Ganster C, et al. Targeted deep sequencing of CD34+ cells from peripheral blood can reproduce bone marrow molecular profile in myelodysplastic syndromes. *American journal of hematology*. 2018;93(6):E152–E154.
7. Rouault-Pierre K, Mian S, Goulard M, et al. Preclinical modeling of myelodysplastic syndromes. *Leukemia*. 2017;31(12):2702.

8. Mizuta S, Yamane N, Komai T, et al. Evaluation of SF3B1 Mutation Screening by High-Resolution Melting Analysis and its Clinical Utility for Myelodysplastic Syndrome with Ring Sideroblasts at the Point of Diagnosis. *Laboratory medicine*. 2018;
9. Li B, Liu J, Jia Y, et al. Clinical features and biological implications of different U2AF1 mutation types in myelodysplastic syndromes. *Genes, Chromosomes and Cancer*. 2018;57(2):80–88.
10. Martín I, Such E, Navarro B, et al. Prognostic impact of gene mutations in myelodysplastic syndromes with ring sideroblasts. *Blood Cancer Journal*. 2017;7(12):630.
11. Duncavage EJ, Jacoby MA, Chang G, et al. Mutation Clearance after Transplantation for Myelodysplastic Syndrome. *New England Journal of Medicine*. 2018;379(11):1028–1041.
12. Montes P, Kerick M, Bernal M, et al. Genomic loss of HLA alleles may affect the clinical outcome in low-risk myelodysplastic syndrome patients. *Oncotarget*. 2018;9(97):36929–36944.
13. Ribeiro A, Coucelo M, Tenreiro R, et al. Clonal shifts in MDS - from SF3B1 to EZH2. *Leukemia & lymphoma*. 2018;1–4.
14. Stosch JM, Heumüller A, Niemöller C, et al. Gene mutations and clonal architecture in myelodysplastic syndromes and changes upon progression to acute myeloid leukaemia and under treatment. *British Journal of Haematology*. 2018;182(6):830–842.
15. Ali A, Huang Y, Pinheiro R, et al. Severely impaired terminal erythroid differentiation as an independent prognostic marker in myelodysplastic syndromes. *Blood Advances*. 2018;2(12):1393–1402.

16. Taskesen E, Havermans M, Lom K van, et al. Two splice-factor mutant leukemia subgroups uncovered at the boundaries of MDS and AML using combined gene expression and DNA-methylation profiling. *Blood*. 2014;123(21):3327–3335.
17. Xu Y, Li Y, Xu Q, et al. Implications of mutational spectrum in myelodysplastic syndromes based on targeted next-generation sequencing. *Oncotarget*. 2017;8(47):82475–82490.
18. Zhang S-J, Rampal R, Manshour T, et al. Genetic analysis of patients with leukemic transformation of myeloproliferative neoplasms shows recurrent SRSF2 mutations that are associated with adverse outcome. *Blood*. 2012;119(19):4480–4485.
19. Matsuda K, Ishida F, Ito T, et al. Spliceosome-related gene mutations in myelodysplastic syndrome can be used as stable markers for monitoring minimal residual disease during follow-up. *Leukemia Research*. 2012;36(11):1393–1397.
20. Je E, Yoo N, Kim Y, Kim M, Lee S. Mutational analysis of splicing machinery genes SF3B1, U2AF1 and SRSF2 in myelodysplasia and other common tumors. *International Journal of Cancer*. 2013;133(1):260–265.
21. Yang J, Qian J, Yao D, et al. SF3B1 mutation is a rare event in Chinese patients with acute and chronic myeloid leukemia. *Clinical Biochemistry*. 2013;46(7–8):701–703.
22. Shlush LI, Zandi S, Mitchell A, et al. Identification of pre-leukaemic haematopoietic stem cells in acute leukaemia. *Nature*. 2014;506(7488):328.

23. Network C. Genomic and epigenomic landscapes of adult de novo acute myeloid leukemia. *The New England journal of medicine*. 2013;368(22):2059–74.
24. Wong TN, Miller CA, Jotte MR, et al. Cellular stressors contribute to the expansion of hematopoietic clones of varying leukemic potential. *Nature Communications*. 2018;9(1):455.
25. Scharenberg C, Giai V, Pellagatti A, et al. Progression in patients with low- and intermediate-1-risk del(5q) myelodysplastic syndromes is predicted by a limited subset of mutations. *Haematologica*. 2016;102(3):498–508.
26. Thol F, Klesse S, Köhler L, et al. Acute myeloid leukemia derived from lympho-myeloid clonal hematopoiesis. *Leukemia*. 2017;31(6):1286–1295.
27. Hirsch P, Zhang Y, Tang R, et al. Genetic hierarchy and temporal variegation in the clonal history of acute myeloid leukaemia. *Nature Communications*. 2016;7(1):12475.
28. Metzeler KH, Herold T, Rothenberg-Thurley M, et al. Spectrum and prognostic relevance of driver gene mutations in acute myeloid leukemia. *Blood*. 2016;128(5):686–98.
29. Papaemmanuil E, Gerstung M, Bullinger L, et al. Genomic Classification and Prognosis in Acute Myeloid Leukemia. *The New England Journal of Medicine*. 2016;374(23):2209–2221.
30. Madan V, Shyamsunder P, Han L, et al. Comprehensive mutational analysis of primary and relapse acute promyelocytic leukemia. *Leukemia*. 2016;30(8):1672.

31. Hou H-A, Liu C-Y, Kuo Y-Y, et al. Splicing factor mutations predict poor prognosis in patients with de novo acute myeloid leukemia. *Oncotarget*. 2016;7(8):9084–9101.
32. Garg M, Nagata Y, Kanojia D, et al. Profiling of somatic mutations in acute myeloid leukemia with FLT3-ITD at diagnosis and relapse. *Blood*. 2015;126(22):2491–2501.
33. Hsu J, Reilly A, Hayes BJ, et al. Reprogramming identifies functionally distinct stages of clonal evolution in myelodysplastic syndromes. *Blood*. 2019;134(2):186–198.
34. Singhal D, Wee L, Kutyna MM, et al. The mutational burden of therapy-related myeloid neoplasms is similar to primary myelodysplastic syndrome but has a distinctive distribution. *Leukemia*. 2019;
35. Lin C, Hou H, Chou W, et al. SF3B1 mutations in patients with myelodysplastic syndromes: The mutation is stable during disease evolution. *American Journal of Hematology*. 2014;89(8):E109–E115.
36. Visconte V, Tabarrokhi A, Gerace CJ, et al. Screening for SF3B1 mutations is a useful tool to differentiate between acquired clonal and non-clonal sideroblastic anemia. *Leukemia & Lymphoma*. 2014;56(6):1888–1890.
37. Makishima H, Yoshida K, Nguyen N, et al. Somatic SETBP1 mutations in myeloid malignancies. *Nature Genetics*. 2013;45(8):942–946.



38. Yang J, Qian J, Lin J, et al. Development of a High-Resolution Melting Analysis for the Detection of the SF3B1 Mutations. *Genetic Testing and Molecular Biomarkers*. 2013;17(4):342–347.
39. Donaires F, Martelli F, Alves-Paiva R de, et al. Splicing factor SF3B1 mutations and ring sideroblasts in myelodysplastic syndromes: a Brazilian cohort screening study. *Revista Brasileira de Hematologia e Hemoterapia*. 2016;38(4):320–324.
40. Bartels S, Schipper E, Hasemeier B, Kreipe H, Lehmann U. Routine clinical mutation profiling using next generation sequencing and a customized gene panel improves diagnostic precision in myeloid neoplasms. *Oncotarget*. 2016;7(21):30084–93.
41. Ohba R, Furuyama K, Yoshida K, et al. Clinical and genetic characteristics of congenital sideroblastic anemia: comparison with myelodysplastic syndrome with ring sideroblast (MDS-RS). *Annals of Hematology*. 2013;92(1):1–9.
42. Nikpour M, Scharenberg C, Liu A, et al. The transporter ABCB7 is a mediator of the phenotype of acquired refractory anemia with ring sideroblasts. *Leukemia*. 2013;27(4):889.
43. Traina F, Visconte V, Elson P, et al. Impact of molecular mutations on treatment response to DNMT inhibitors in myelodysplasia and related neoplasms. *Leukemia*. 2014;28(1):78.
44. Martín I, Such E, Navarro B, et al. Negative impact on clinical outcome of the mutational co-occurrence of SF3B1 and DNMT3A in refractory anemia with ring sideroblasts (RARS). *Leukemia & Lymphoma*. 2016;58(7):1–8.

45. Seo J, Lee K-O, Kim S-H, et al. Clinical significance of SF3B1 mutations in Korean patients with myelodysplastic syndromes and myelodysplasia/myeloproliferative neoplasms with ring sideroblasts. *Annals of Hematology*. 2014;93(4):603–608.
46. Xu L, Gu Z-HH, Li Y, et al. Genomic landscape of CD34+ hematopoietic cells in myelodysplastic syndrome and gene mutation profiles as prognostic markers. *Proceedings of the National Academy of Sciences of the United States of America*. 2014;111(23):8589–94.
47. Malcovati L, Papaemmanuil E, Bowen DT, et al. Clinical significance of SF3B1 mutations in myelodysplastic syndromes and myelodysplastic/myeloproliferative neoplasms. *Blood*. 2011;118(24):6239–6246.
48. Visconte V, Makishima H, Jankowska A, et al. SF3B1, a splicing factor is frequently mutated in refractory anemia with ring sideroblasts. *Leukemia*. 2011;26(3):leu2011232.
49. Patnaik MM, Lasho TL, Hodnefield JM, et al. SF3B1 mutations are prevalent in myelodysplastic syndromes with ring sideroblasts but do not hold independent prognostic value. *Blood*. 2012;119(2):569–572.
50. Papaemmanuil E, Cazzola M, Boultonwood J, et al. Somatic SF3B1 mutation in myelodysplasia with ring sideroblasts. *The New England journal of medicine*. 2011;365(15):1384–95.
51. Yoshida K, Sanada M, Shiraishi Y, et al. Frequent pathway mutations of splicing machinery in myelodysplasia. *Nature*. 2011;478(7367):64–9.

52. Papaemmanuil E, Gerstung M, Malcovati L, et al. Clinical and biological implications of driver mutations in myelodysplastic syndromes. *Blood*. 2013;122(22):3616–27; quiz 3699.
53. Chesnais V, Renneville A, Toma A, et al. Effect of lenalidomide treatment on clonal architecture of myelodysplastic syndromes without 5q deletion. *Blood*. 2016;127(6):749–60.
54. Lindsley R, Mar BG, Mazzola E, et al. Acute myeloid leukemia ontogeny is defined by distinct somatic mutations. *Blood*. 2015;125(9):1367–76.
55. Tyner JW, Tognon CE, Bottomly D, et al. Functional genomic landscape of acute myeloid leukaemia. *Nature*. 2018;1–6.
56. Dunlap JB, Leonard J, Rosenberg M, et al. The combination of NPM1, DNMT3A, and IDH1/2 mutations leads to inferior overall survival in AML. *American journal of hematology*. 2019;94(8):913–920.
57. Pellagatti A, Armstrong RN, Steeples V, et al. Impact of spliceosome mutations on RNA splicing in myelodysplasia: dysregulated genes/pathways and clinical associations. *Blood*. 2018;132(12):1225–1240.
58. Ohgami RS, Ma L, Merker JD, et al. Next-generation sequencing of acute myeloid leukemia identifies the significance of TP53, U2AF1, ASXL1, and TET2 mutations. *Modern Pathology*. 2015;28(5):706.

59. Gröschel S, Sanders MA, Hoogenboezem R, et al. Mutational spectrum of myeloid malignancies with inv(3)/t(3;3) reveals a predominant involvement of RAS/RTK signaling pathways. *Blood*. 2015;125(1):133–9.
60. Cho Y-UU, Jang S, Seo E-JJ, et al. Preferential occurrence of spliceosome mutations in acute myeloid leukemia with preceding myelodysplastic syndrome and/or myelodysplasia morphology. *Leukemia & lymphoma*. 2015;56(8):2301–8.
61. Mian SA, Smith AE, Kulasekararaj AG, et al. Spliceosome mutations exhibit specific associations with epigenetic modifiers and proto-oncogenes mutated in myelodysplastic syndrome. *Haematologica*. 2013;98(7):1058–1066.
62. Makishima H, Visconte V, Sakaguchi H, et al. Mutations in the spliceosome machinery, a novel and ubiquitous pathway in leukemogenesis. *Blood*. 2012;119(14):3203–10.
63. Eisfeld A-KK, Kohlschmidt J, Mrózek K, et al. Mutational Landscape and Gene Expression Patterns in Adult Acute Myeloid Leukemias with Monosomy 7 as a Sole Abnormality. *Cancer research*. 2017;77(1):207–218.
64. Mossner M, Jann J-CC, Wittig J, et al. Mutational hierarchies in myelodysplastic syndromes dynamically adapt and evolve upon therapy response and failure. *Blood*. 2016;128(9):1246–59.
65. Silva-Coelho P da, Kroeze LI, Yoshida K, et al. Clonal evolution in myelodysplastic syndromes. *Nature Communications*. 2017;8:15099.

66. Mortera-Blanco T, Dimitriou M, Woll PS, et al. SF3B1-initiating mutations in MDS-RSs target lymphomyeloid hematopoietic stem cells. *Blood*. 2017;130(7):881–890.
67. Yoshimi A, Lin K-T, Wiseman DH, et al. Coordinated alterations in RNA splicing and epigenetic regulation drive leukaemogenesis. *Nature*. 2019;1–5.
68. Jaiswal S, Fontanillas P, Flannick J, et al. Age-Related Clonal Hematopoiesis Associated with Adverse Outcomes. *The New England Journal of Medicine*. 2014;371(26):.
69. Genovese G, Kähler AK, Handsaker RE, et al. Clonal Hematopoiesis and Blood-Cancer Risk Inferred from Blood DNA Sequence. *New England Journal of Medicine*. 2014;371(26):2477–2487.
70. Jaiswal S, Natarajan P, Silver AJ, et al. Clonal Hematopoiesis and Risk of Atherosclerotic Cardiovascular Disease. *New Engl J Medicine*. 2017;377(2):111–121.
71. Desai P, Mencia-Trinchant N, Savenkov O, et al. Somatic mutations precede acute myeloid leukemia years before diagnosis. *Nature Medicine*. 2018;24(7):1015–1023.
72. Frick M, Chan W, Arends CM, et al. Role of Donor Clonal Hematopoiesis in Allogeneic Hematopoietic Stem-Cell Transplantation. *J Clin Oncol*. 2019;37(5):375–385.
73. Dorsheimer L, Assmus B, Rasper T, et al. Hematopoietic alterations in chronic heart failure patients by somatic mutations leading to clonal hematopoiesis. *Haematologica*. 2019;haematol.2019.224402.

74. Coombs CC, Gillis NK, Tan X, et al. Identification of clonal hematopoiesis mutations in solid tumor patients undergoing unpaired next-generation sequencing assays. *Clinical Cancer Research*. 2018;24(23):clincanres.1201.2018.
75. Ptashkin RN, Mandelker DL, Coombs CC, et al. Prevalence of Clonal Hematopoiesis Mutations in Tumor-Only Clinical Genomic Profiling of Solid Tumors. *JAMA Oncology*. 2018;
76. Arends C, Galan-Sousa J, Hoyer K, et al. Hematopoietic lineage distribution and evolutionary dynamics of clonal hematopoiesis. *Leukemia*. 2018;32(9):1908–1919.
77. Coombs CC, Zehir A, Devlin SM, et al. Therapy-Related Clonal Hematopoiesis in Patients with Non-hematologic Cancers Is Common and Associated with Adverse Clinical Outcomes. *Cell stem cell*. 2017;21(3):374-382.e4.
78. Zink F, Stacey SN, Norddahl GL, et al. Clonal hematopoiesis, with and without candidate driver mutations, is common in the elderly. *Blood*. 2017;130(6):742–752.
79. Acuna-Hidalgo R, Sengul H, Steehouwer M, et al. Ultra-sensitive Sequencing Identifies High Prevalence of Clonal Hematopoiesis-Associated Mutations throughout Adult Life. *Am J Hum Genetics*. 2017;101(1):50–64.
80. Gibson CJ, Lindsley RC, Tchekmedyian V, et al. Clonal Hematopoiesis Associated With Adverse Outcomes After Autologous Stem-Cell Transplantation for Lymphoma. *J Clin Oncol*. 2017;35(14):JCO.2016.71.671.

81. McKerrell T, Park N, Moreno T, et al. Leukemia-associated somatic mutations drive distinct patterns of age-related clonal hemopoiesis. *Cell reports*. 2015;10(8):1239–1245.

82. Razavi P, Li BT, Brown DN, et al. High-intensity sequencing reveals the sources of plasma circulating cell-free DNA variants. *Nat Med*. 2019;25(12):1928–1937.

83. Xie M, Lu C, Wang J, et al. Age-related mutations associated with clonal hematopoietic expansion and malignancies. *Nature Medicine*. 2014;20(12):1472.

84. Abelson S, Collord G, Ng SW, et al. Prediction of acute myeloid leukaemia risk in healthy individuals. *Nature*. 2018;1.

85. Young AL, Tong RS, Birmann BM, Druley TE. Clonal haematopoiesis and risk of acute myeloid leukemia. *Haematologica*. 2019;haematol.2018.215269.

86. Hansen JW, Pedersen DA, Larsen LA, et al. Clonal hematopoiesis in elderly twins: concordance, discordance and mortality. *Blood*. 2019;

87. Fabre MA, McKerrell T, Zwiebel M, et al. Concordance for clonal hematopoiesis is limited in elderly twins. *Blood*. 2019;

88. Boucai L, Falcone J, Ukena J, et al. Radioactive Iodine–Related Clonal Hematopoiesis in Thyroid Cancer Is Common and Associated With Decreased Survival. *J Clin Endocrinol Metabolism*. 2018;103(11):4216–4223.
